# Supplementary material for: Comparative Genomics ofH. pyloriand Non-PyloriHelicobacterSpecies to Identify New Regions Associated with Its Pathogenicity and Adaptability
Source: Hindawi journal article supplement (doi:10.1155/2016/6106029), 2016-01-01
Supplement: f1 [file 6106029.f1.pdf]

**Supplementary Table S1** Unique regions of *H. pylori* (URHP) and function annotations of relative genes

| UR id | UR start | UR end | Operon id | Gene id | gene start | gene end | Strand (+/-) | STRING protein | function                                          |
|-------|----------|--------|-----------|---------|------------|----------|--------------|----------------|---------------------------------------------------|
| UR_1  | 23280    | 25697  | UO_1      | orf_22  | 23324      | 25459    | -            | hopD           | membrane protein (babB/hopT)                      |
| UR_2  | 61346    | 62217  | UO_2      | orf_48  | 61619      | 61828    | +            | C694_00270     | hypothetical protein                              |
|       |          |        |           | orf_50  | 64016      | 66457    | +            | C694_00285     | hypothetical protein                              |
|       |          |        |           | orf_51  | 66454      | 67023    | +            | C694_00290     | hypothetical protein                              |
|       |          |        |           | orf_52  | 67039      | 67299    | +            | C694_00295     | hypothetical protein                              |
| UR_3  | 63741    | 72040  | UO_3      | orf_53  | 67310      | 68800    | +            | C694_00300     | 5-amino-6-(5-phosphoribosylamino)uracil reductase |
|       |          |        |           | orf_54  | 68770      | 69189    | +            | C694_00305     | cell division protein                             |
|       |          |        |           | orf_55  | 69191      | 69544    | +            | HP_0065        | hypothetical protein HP0065                       |
|       |          |        |           | orf_56  | 69468      | 71963    | +            | HP_0066        | ATP-binding protein                               |
| UR_4  | 110620   | 112829 | UO_4      | orf_92  | 110928     | 112673   | -            | HP_0104        | 2', 3'-cyclic nucleotide 2'-phosphodiesterase     |
|       |          |        | UO_5      | orf_106 | 127931     | 129118   | -            | C694_00585     | hypothetical protein                              |
| UR_5  | 127589   | 132369 | UO_6      | orf_107 | 129383     | 130768   | -            | C694_00590     | hypothetical protein                              |
|       |          |        | UO_7      | orf_108 | 131053     | 132249   | -            | C694_00595     | hypothetical protein                              |
| UR_6  | 139156   | 140261 | UO_8      | orf_116 | 139319     | 139444   | +            | HP_0128        | hypothetical protein                              |
|       |          |        | UO_9      | orf_117 | 139617     | 140042   | +            | C694_00635     | hypothetical protein                              |
| UR_7  | 142004   | 142226 | UO_10     | orf_119 | 142028     | 142129   | +            | C694_00645     | hypothetical protein                              |
| UR_8  | 167642   | 169944 | UO_11     | orf_147 | 168882     | 169802   | +            | hcpD           | Sell repeat protein HcpD                          |
| UR_9  | 174457   | 175265 | UO_12     | orf_151 | 174691     | 175164   | -            | HP_0167        | hypothetical protein HP0167                       |
| UR_10 | 181448   | 181798 | UO_13     | orf_159 | 181499     | 181717   | -            | -              | hypothetical protein                              |
| UR_11 | 192313   | 195290 | UO_14     | orf_171 | 193210     | 194424   | -            | HP_0186        | hypothetical protein                              |
| UR_12 | 214261   | 216146 | UO_15     | orf_189 | 214745     | 216097   | +            | C694_01050     | membrane protein                                  |
| UR_13 | 218066   | 219071 | UO_16     | orf_191 | 218266     | 219018   | -            | hcpA           | Sell repeat protein                               |
| UR_14 | 230507   | 230997 | UO_17     | orf_202 | 230651     | 230872   | +            | C694_01120     | CopG family transcriptional regulator             |
|       |          |        | UO_18     | orf_206 | 234973     | 237048   | -            | omp5           | membrane protein (babB/hopT)                      |
| UR_15 | 234760   | 240378 | UO_19     | orf_207 | 237297     | 238469   | +            | HP_0228        | sulfate permease                                  |
|       |          |        | UO_20     | orf_208 | 238708     | 240159   | -            | hopA           | membrane protein                                  |
| UR_16 | 321866   | 323095 | UO_21     | orf_281 | 321928     | 322917   | +            | C694_01535     | alginate lyase                                    |
|       |          |        |           | orf_286 | 325790     | 326668   | +            | C694_01560     | amidohydrolase                                    |
|       |          |        |           | orf_287 | 326681     | 327562   | +            | C694_01565     | peptidoglycan deacetylase                         |
| UR_17 | 325693   | 330332 | UO_22     | orf_288 | 327608     | 327976   | +            | C694_01570     | hypothetical protein                              |
|       |          |        |           | orf_289 | 327976     | 328941   | +            | C694_01575     | ATP-binding protein                               |
|       |          |        |           | UO_23   | orf_290    | 328947   | 330092       | -              | C694_01580                                        |
| UR_18 | 349703   | 350646 | UO_24     | orf_311 | 349779     | 350084   | +            | C694_01710     | hypothetical protein                              |
|       |          |        |           | orf_312 | 350068     | 350634   | +            | C694_01715     | hypothetical protein                              |
| UR_19 | 367117   | 367902 | UO_25     | orf_327 | 367133     | 367885   | -            | C694_01810     | oxidoreductase                                    |
| UR_20 | 394336   | 395240 | UO_26     | orf_350 | 394337     | 395089   | -            | C694_01950     | sporulation protein                               |
|       |          |        |           | orf_387 | 439284     | 441143   | -            | HP0424         | hypothetical protein                              |
| UR_21 | 438354   | 444565 | UO_27     | orf_388 | 441185     | 442438   | -            | C694_02165     | hypothetical protein                              |
|       |          |        |           | orf_389 | 442479     | 444215   | -            | HP0426         | hypothetical protein HP1409                       |
| UR_22 | 494105   | 495221 | UO_28     | orf_424 | 494379     | 494939   | -            | omp11          | membrane protein                                  |

|       |        |        |       |         |        |        |   |            |                                                     |
|-------|--------|--------|-------|---------|--------|--------|---|------------|-----------------------------------------------------|
| UR_23 | 507957 | 509230 | UO_29 | orf_434 | 508122 | 509066 | - | C694_02495 | catalase                                            |
| UR_24 | 537568 | 537961 | UO_30 | orf_456 | 537802 | 537918 | + | C694_02625 | hypothetical protein                                |
| UR_25 | 539660 | 541958 | UO_31 | orf_458 | 539973 | 541949 | + | C694_02640 | hypothetical protein                                |
|       |        |        | UO_32 | orf_464 | 546322 | 547152 | - | hp519      | hypothetical protein                                |
|       |        |        | UO_33 | orf_465 | 547328 | 547675 | + | cag1       | type IV secretion system protein Cag1               |
|       |        |        | UO_34 | orf_466 | 548134 | 549579 | + | cag3       | type IV secretion system protein Cag3               |
|       |        |        |       | orf_467 | 549589 | 550098 | + | cag4       | (virB1) type IV secretion system protein Cag4       |
|       |        |        | UO_35 | orf_468 | 550217 | 552463 | - | cag5       | (virD4) type IV secretion system protein Cag5       |
|       |        |        |       | orf_469 | 552472 | 553464 | - | HP0525     | (virB11) type IV secretion system ATPase            |
|       |        |        |       | orf_470 | 553469 | 554068 | - | cag6       | type IV secretion system protein Cag6/CagZ          |
|       |        |        | UO_36 | orf_471 | 554206 | 559989 | - | cag7       | (virB10) type IV secretion system protein Cag7/CagY |
|       |        |        |       | orf_472 | 560004 | 561572 | - | cag8       | (virB9) type IV secretion system protein Cag8/CagX  |
|       |        |        |       | orf_473 | 561625 | 563232 | - | cag9       | (virB6) type IV secretion system protein Cag9/CagW  |
|       |        |        |       | orf_474 | 563237 | 563995 | - | cagV       | (virB8) type IV secretion system protein Cag10/CagV |
|       |        |        | UO_37 | orf_475 | 564381 | 565037 | + | cagU       | type IV secretion system protein Cag11/CagU         |
|       |        |        |       | orf_476 | 565073 | 565915 | + | cagT       | (virB7) type IV secretion system protein Cag12/CagT |
| UR_26 | 546235 | 583503 | UO_38 | orf_477 | 566126 | 566716 | - | cagS       | type IV secretion system protein Cag13/CagS         |
|       |        |        | UO_39 | orf_478 | 567142 | 567522 | - | cagQ       | type IV secretion system protein Cag14/CagQ         |
|       |        |        | UO_40 | orf_479 | 567955 | 568299 | - | cagP       | type IV secretion system protein Cag15/CagP         |
|       |        |        | UO_41 | orf_480 | 568723 | 569853 | + | cagM       | type IV secretion system protein Cag16/CagM         |
|       |        |        |       | orf_481 | 569868 | 570788 | + | cagN       | type IV secretion system protein Cag17/CagN         |
|       |        |        |       | orf_482 | 570870 | 571583 | - | cagL       | (virB5) type IV secretion system protein Cag18/CagL |
|       |        |        |       | orf_483 | 571580 | 572725 | - | cagI       | type IV secretion system protein Cag19/CagI         |
|       |        |        |       | orf_484 | 572736 | 573848 | - | cagH       | type IV secretion system protein Cag20/CagH         |
|       |        |        | UO_42 | orf_485 | 573864 | 574292 | - | cagG       | type IV secretion system protein Cag21/CagG         |
|       |        |        |       | orf_486 | 574347 | 575153 | - | cagF       | type IV secretion system protein Cag22/CagF         |
|       |        |        |       | orf_487 | 575155 | 578106 | - | cagE       | (virB4) type IV secretion system protein Cag23/CagE |
|       |        |        |       | orf_488 | 578115 | 578738 | - | cagD       | type IV secretion system protein Cag24/CagD         |
|       |        |        |       | orf_489 | 578740 | 579087 | - | cagC       | (virB2) type IV secretion system protein Cag25/CagC |
|       |        |        | UO_43 | orf_490 | 579231 | 579458 | - | -          | cag pathogenicity island protein                    |
|       |        |        | UO_44 | orf_491 | 579921 | 583481 | + | 0547       | T4SS translocated effector CagA                     |
| UR_27 | 588026 | 589445 | UO_45 | orf_496 | 588072 | 588755 | + | C694_02860 | RNA methyltransferase                               |
| UR_28 | 593759 | 594325 | UO_46 | orf_502 | 594037 | 594273 | - | acpP       | acyl carrier protein                                |
| UR_29 | 600175 | 601079 | UO_47 | orf_510 | 600177 | 600944 | - | C694_02930 | hypothetical protein HP0568                         |
| UR_30 | 656821 | 659066 | UO_48 | orf_551 | 657634 | 658335 | - | C694_03170 | ABC transporter ATP-binding protein                 |
|       |        |        | UO_49 | orf_552 | 658630 | 658965 | - | HP_0614    | hypothetical protein HP0614                         |
| UR_31 | 675021 | 677810 | UO_50 | orf_564 | 675124 | 677169 | + | C694_03255 | hypothetical protein                                |
|       |        |        | UO_51 | orf_565 | 677214 | 677798 | - | C694_03260 | NADPH quinone reductase MdaB                        |
| UR_32 | 683582 | 685165 | UO_52 | orf_571 | 684146 | 684598 | - | C694_03295 | hypothetical protein                                |
| UR_33 | 687838 | 688693 | UO_53 | orf_576 | 687928 | 688581 | + | fixA       | NAD(P)H nitroreductase                              |
|       |        |        |       | orf_613 | 740559 | 741734 | + | C694_03555 | acetyl-CoA acetyltransferase                        |
| UR_34 | 740425 | 744508 | UO_54 | orf_614 | 741745 | 742443 | + | scoA       | succinyl-CoA--3-ketoacid CoA transferase subunit A  |
|       |        |        |       | orf_615 | 742440 | 743063 | + | scoB       | succinyl-CoA--3-ketoacid CoA transferase subunit B  |
|       |        |        |       | orf_616 | 743083 | 744447 | + | C694_03570 | short-chain fatty acids transporter                 |

|       |         |         |       |          |         |         |   |            |                                                        |
|-------|---------|---------|-------|----------|---------|---------|---|------------|--------------------------------------------------------|
|       |         |         |       | orf_617  | 745801  | 747942  | + | C694_03590 | acetone carboxylase subunit beta                       |
| UR_35 | 745761  | 752123  | UO_55 | orf_618  | 747954  | 750251  | + | C694_03595 | acetone carboxylase subunit alpha                      |
|       |         |         |       | orf_619  | 750262  | 750768  | + | HP_0697    | acetone carboxylase subunit gamma                      |
|       |         |         | UO_56 | orf_620  | 751085  | 752113  | + | C694_03605 | hypothetical protein HP0699                            |
| UR_36 | 762802  | 766591  | UO_57 | orf_629  | 762809  | 763711  | + | C694_03650 | acetolactate synthase                                  |
|       |         |         | UO_58 | orf_630  | 763982  | 765964  | + | homA       | membrane protein                                       |
|       |         |         | UO_59 | orf_637  | 773625  | 774083  | + | C694_03710 | zinc ABC transporter substrate-binding protein         |
|       |         |         | UO_60 | orf_638  | 774515  | 776341  | + | C694_03715 | membrane protein                                       |
| UR_37 | 772934  | 781183  | UO_61 | orf_639  | 776481  | 777473  | - | ansA       | L-asparaginase II                                      |
|       |         |         | UO_62 | orf_640  | 777602  | 778933  | + | dcuA       | anaerobic C4-dicarboxylate transporter                 |
|       |         |         | UO_63 | orf_641  | 779008  | 780897  | - | sabA       | (sabA/hopP) outer membrane protein                     |
|       |         |         |       | orf_645  | 784203  | 785270  | - | C694_03750 | ATP-binding protein                                    |
| UR_38 | 784163  | 789374  | UO_64 | orf_646  | 785279  | 785584  | - | C694_03755 | hypothetical protein                                   |
|       |         |         | UO_65 | orf_647  | 785676  | 787397  | - | C694_03760 | hypothetical protein                                   |
| UR_39 | 834493  | 835031  | UO_66 | orf_691  | 834559  | 834831  | + | 0780       | hypothetical protein HP0780                            |
| UR_40 | 845203  | 845413  | UO_67 | orf_699  | 845257  | 845403  | - | C694_04045 | hypothetical protein                                   |
| UR_41 | 853068  | 853974  | UO_68 | orf_706  | 853092  | 853928  | - | C694_04080 | membrane protein                                       |
|       |         |         | UO_69 | orf_737  | 878363  | 879184  | + | hpgalT     | glycosyltransferase                                    |
| UR_42 | 878299  | 879962  | UO_70 | orf_738  | 879390  | 879638  | - | C694_04235 | ss-DNA binding protein 12RNP2 precursor                |
|       |         |         |       | orf_752  | 894519  | 895178  | - | thiE       | thiamine-phosphate synthase                            |
|       |         |         |       | orf_753  | 895171  | 895983  | - | thiD       | hydroxymethylpyrimidine/phosphomethylpyrimidine kinase |
| UR_43 | 894502  | 899845  | UO_71 | orf_754  | 895977  | 896798  | - | thiM       | hydroxyethylthiazole kinase                            |
|       |         |         |       | orf_755  | 896843  | 899443  | - | C694_04335 | type I restriction enzyme R protein (hsdR)             |
| UR_44 | 901058  | 903549  | UO_72 | orf_758  | 901118  | 902701  | - | HP_0850    | type I restriction enzyme M protein (hsdM)             |
| UR_45 | 906510  | 907520  | UO_73 | orf_762  | 906519  | 907502  | + | guaC       | guanosine 5'-monophosphate oxidoreductase              |
|       |         |         | UO_74 | orf_779  | 922781  | 923515  | - | cdh        | CDP-diacylglycerol pyrophosphatase                     |
| UR_46 | 922637  | 924232  | UO_75 | orf_780  | 923867  | 924196  | + | phnA       | alkylphosphonate uptake protein (phnA)                 |
|       |         |         |       | orf_786  | 930391  | 930564  | + | C694_04495 | hypothetical protein                                   |
| UR_47 | 930256  | 931124  | UO_76 | orf_787  | 930515  | 931123  | + | HP_0879    | hypothetical protein HP0879                            |
|       |         |         |       | orf_808  | 952928  | 953053  | - | C694_04625 | membrane protein                                       |
| UR_48 | 952836  | 953370  | UO_77 | orf_809  | 953064  | 953363  | - | 0902       | cupin                                                  |
| UR_49 | 968878  | 971027  | UO_78 | orf_820  | 969238  | 970782  | - | C694_04705 | membrane protein                                       |
|       |         |         | UO_79 | orf_837  | 995544  | 996029  | + | C694_04810 | hypothetical protein                                   |
| UR_50 | 995540  | 999607  | UO_80 | orf_838  | 996532  | 997701  | - | C694_04820 | proline/betaine transporter ProP                       |
|       |         |         | UO_81 | orf_839  | 999197  | 999544  | - | C694_04830 | hypothetical protein                                   |
| UR_51 | 1008122 | 1008877 | UO_82 | orf_848  | 1008470 | 1008832 | + | HP_0947    | hypothetical protein                                   |
| UR_52 | 1012910 | 1013558 | UO_83 | orf_854  | 1012922 | 1013488 | - | C694_04910 | hypothetical protein                                   |
| UR_53 | 1042108 | 1043499 | UO_84 | orf_879  | 1042237 | 1043394 | + | ftsZ       | cell division protein FtsZ                             |
| UR_54 | 1044552 | 1045073 | UO_85 | orf_880  | 1044552 | 1044854 | + | C694_05050 | hypothetical protein                                   |
| UR_55 | 1047036 | 1047925 | UO_86 | orf_882  | 1047054 | 1047878 | + | pz19b      | mechanosensitive ion channel protein                   |
| UR_56 | 1085029 | 1085310 | UO_87 | orf_910  | 1085083 | 1085244 | + | -          | hypothetical protein HP1021a                           |
| UR_57 | 1177664 | 1178407 | UO_88 | orf_1002 | 1177684 | 1178370 | - | C694_05750 | hypothetical protein                                   |
|       |         |         |       | orf_1013 | 1190157 | 1190696 | - | excC       | peptidoglycan-binding protein                          |
| UR_58 | 1189558 | 1192654 | UO_89 | orf_1014 | 1190763 | 1192016 | - | tolB       | protein TolB                                           |

|       |         |         |        |          |         |         |   |            |                                                |
|-------|---------|---------|--------|----------|---------|---------|---|------------|------------------------------------------------|
| UR_59 | 1219101 | 1221392 | UO_90  | orf_1039 | 1219226 | 1221316 | + | C694_05970 | membrane protein                               |
| UR_60 | 1232283 | 1234285 | UO_91  | orf_1050 | 1232603 | 1234018 | + | C694_06025 | membrane protein                               |
| UR_61 | 1239535 | 1240304 | UO_92  | orf_1056 | 1239650 | 1240201 | + | C694_06060 | hypothetical protein                           |
| UR_62 | 1243302 | 1245610 | UO_93  | orf_1059 | 1243583 | 1245508 | - | hopQ       | membrane protein                               |
| UR_63 | 1254165 | 1255748 | UO_94  | orf_1067 | 1254325 | 1255500 | - | sotB       | sugar efflux transporter                       |
| UR_64 | 1256712 | 1259388 | UO_95  | orf_1069 | 1256746 | 1257903 | - | C694_06145 | hypothetical protein                           |
| UR_65 | 1263078 | 1263636 | UO_96  | orf_1073 | 1263276 | 1263557 | - | C694_06170 | flagellar protein                              |
| UR_66 | 1362437 | 1364093 | UO_97  | orf_1162 | 1362519 | 1363067 | + | C694_06645 | hypothetical protein (fliZ)                    |
|       |         |         | UO_98  | orf_1163 | 1363131 | 1363784 | - | tenA       | Transcriptional regulator (tenA)               |
| UR_67 | 1364473 | 1365338 | UO_99  | orf_1165 | 1364730 | 1365215 | + | C694_06660 | membrane protein                               |
| UR_68 | 1382657 | 1383359 | UO_100 | orf_1198 | 1382720 | 1383325 | + | HP_1322    | hypothetical protein HP1322                    |
| UR_69 | 1400125 | 1403022 | UO_101 | orf_1218 | 1400936 | 1403011 | + | HP0227     | membrane protein (babB/hopT)                   |
| UR_70 | 1432753 | 1436250 | UO_102 | orf_1245 | 1433295 | 1436201 | + | C694_07075 | helicase                                       |
| UR_71 | 1445984 | 1446846 | UO_103 | orf_1256 | 1446085 | 1446477 | - | HP_1382    | endonuclease                                   |
| UR_72 | 1455905 | 1457772 | UO_104 | orf_1270 | 1456007 | 1456735 | + | C694_07210 | membrane protein                               |
|       |         |         |        | orf_1280 | 1477927 | 1479663 | + | HP_0426    | hypothetical protein HP1409                    |
| UR_73 | 1477577 | 1483763 | UO_105 | orf_1281 | 1479704 | 1480888 | + | C694_07290 | hypothetical protein                           |
|       |         |         |        | orf_1282 | 1481000 | 1482859 | + | HP0424     | hypothetical protein                           |
| UR_74 | 1513142 | 1513961 | UO_107 | orf_1307 | 1513143 | 1513922 | - | C694_07460 | hypothetical protein                           |
| UR_75 | 1521687 | 1525911 | UO_108 | orf_1320 | 1521892 | 1524132 | + | C694_07525 | membrane protein                               |
|       |         |         | UO_109 | orf_1321 | 1524949 | 1525860 | - | C694_07530 | hypothetical protein                           |
| UR_76 | 1614876 | 1615862 | UO_110 | orf_1397 | 1615030 | 1615716 | + | C694_07965 | hypothetical protein                           |
| UR_77 | 1643914 | 1645222 | UO_111 | orf_1422 | 1643982 | 1644983 | - | C694_08095 | iron ABC transporter substrate-binding protein |
| UR_78 | 1645802 | 1646775 | UO_112 | orf_1424 | 1645960 | 1646775 | + | HP_1564    | ABC transporter substrate-binding protein      |
|       |         |         | UO_113 | orf_1446 | 1666029 | 1666790 | - | HP_1588    | hypothetical protein                           |
| UR_79 | 1664738 | 1667839 | UO_114 | orf_1447 | 1667057 | 1667680 | - | C694_08245 | hypothetical protein                           |
|       |         |         |        | orf_1448 | 1667681 | 1667800 | - | C694_08250 | hypothetical protein                           |

Note: 1. The position information is based on genome of *H. pylori* 26695. STRING protein is the correspond labels used for the protein interaction nodes in Figure 6 and Figure S1. Functional information was annotated by VFDB, COG, InterProScane and NR databases.

2. UR id, UR start, UR end, Operon id, Gene id, gene start, gene end, Strand (+/-), STRING protein id and gene function are listed.

**Supplementary Table S2** sRNAs shared by all *H. pylori* but absent from NHPS

| ID  | Start   | End     | Strand | Type                             | Matching gene                | Tools               |
|-----|---------|---------|--------|----------------------------------|------------------------------|---------------------|
| SR1 | 5,506   | 5,548   | -      | SAM                              | membrane protein (HP0009)    | Dam                 |
| SR2 | 24,212  | 24,278  | .      | ncRNA                            | membrane protein (HP0025)    | atypicalGC          |
| SR3 | 25,346  | 25,409  | .      | ncRNA                            | -                            | BLAST/CG-seq/caRNAC |
| SR4 | 64,875  | 64,962  | +      | snoR11                           | -                            | INFERNAL            |
| SR5 | 218,832 | 218,897 | +      | ncRNA                            | beta-lactamase HcpA          | INFERNAL            |
| SR6 | 236,700 | 236,804 | .      | ncRNA                            | membrane protein (HP1342)    | atypicalGC          |
| SR7 | 635,392 | 635,427 | -      | CRISPR RNA direct repeat element | -                            | ERPIN               |
| SR8 | 688,568 | 688,674 | -      | snR87                            | -                            | INFERNAL            |
| SR9 | 740,862 | 740,926 | .      | ncRNA                            | Acetyl CoA acetyltransferase | atypicalGC          |

|      |           |           |   |                                  |                                                          |                     |
|------|-----------|-----------|---|----------------------------------|----------------------------------------------------------|---------------------|
| SR10 | 742,045   | 742,119   | . | ncRNA                            | 3-ketoacid-CoA transferase subunit A                     | atypicalGC          |
| SR11 | 746,847   | 746,905   | . | ncRNA                            | Acetone carboxylase subunit beta                         | atypicalGC          |
| SR12 | 763,284   | 763,344   | . | ncRNA                            | S-adenosyl-l-methionine hydroxide<br>adenosyltransferase | atypicalGC          |
| SR13 | 770,646   | 771,019   | . | ncRNA                            | DNA polymerase III subunits gamma and tau                | BLAST/CG-seq/caRNAc |
| SR14 | 773,028   | 773,176   | . | ncRNA                            | -                                                        | BLAST/CG-seq/caRNAc |
| SR15 | 775,868   | 775,969   | . | ncRNA                            | membrane_protein                                         | BLAST/CG-seq/caRNAc |
| SR16 | 895,871   | 895,924   | . | ncRNA                            | phosphomethylpyrimidine kinase                           | atypicalGC          |
| SR17 | 923,019   | 923,101   | - | sroD                             | CDP-diacylglycerol pyrophosphatase                       | INFERNAL            |
| SR18 | 930,481   | 930,491   | + | CRISPR RNA direct repeat element | -                                                        | ERPIN               |
| SR19 | 938,532   | 938,603   | . | ncRNA                            | Vacuolating cytotoxin autotransporter                    | atypicalGC          |
| SR20 | 965,481   | 965,594   | . | ncRNA                            | membrane protein (HP0912)                                | atypicalGC          |
| SR21 | 967,499   | 967,550   | . | ncRNA                            | membrane protein (HP0913)                                | atypicalGC          |
| SR22 | 1,319,663 | 1,319,790 | . | ncRNA                            | membrane protein (HP1243)                                | atypicalGC          |
| SR23 | 1,401,180 | 1,401,284 | . | ncRNA                            | membrane protein (HP1342)                                | atypicalGC          |
| SR24 | 1,415,226 | 1,415,331 | + | SNORA62                          | -                                                        | INFERNAL            |
| SR25 | 1,433,041 | 1,433,098 | + | sR16                             | adenine-specific DNA methyltransferase                   | INFERNAL            |
| SR26 | 1,497,079 | 1,497,140 | . | ncRNA                            | -                                                        | atypicalGC          |
| SR27 | 1,525,762 | 1,525,812 | + | SAM                              | -                                                        | Darn                |
| SR28 | 1,527,694 | 1,527,769 | + | snoR4                            | -                                                        | INFERNAL            |

Note: 1. The position information is based on genome of *H. pylori* 26695.

2. sRNAs ID, Start, End, Strand, sRNAs family type, Matching gene and Tools are listed.

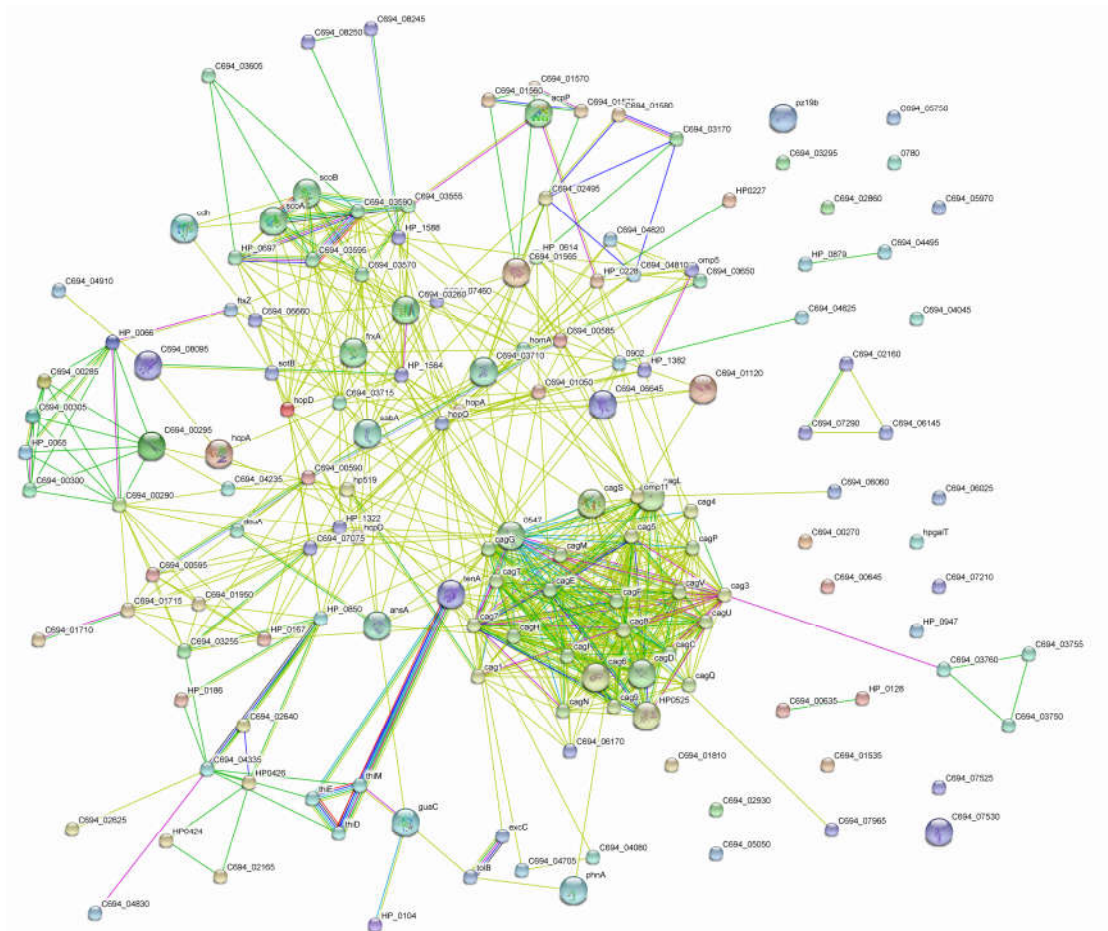

**Supplementary Fig. S1** Protein-protein interaction networks of 155 URHP genes. A total of 125 proteins were assigned to one interaction network. Network nodes represent proteins and edges represent protein-protein associations. Different colors represent the types of evidence for the interwork.
